# Supplementary material for: Multiple Integrated Non-clinical Studies Predict the Safety of Lentivirus-Mediated Gene Therapy for β-Thalassemia
Source: PubMed Central journal article supplement (PMC6178212; doi:10.1016/j.omtm.2018.09.001), 2018-09-13
Supplement: mmc1.pdf [file mmc1.pdf]

**OMTM, Volume 11**

## **Supplemental Information**

### **Multiple Integrated Non-clinical Studies**

#### **Predict the Safety of Lentivirus-Mediated**

#### **Gene Therapy for $\beta$ -Thalassemia**

**Maria Rosa Lidonnici, Ylenia Paleari, Francesca Tiboni, Giacomo Mandelli, Claudia Rossi, Michela Vezzoli, Annamaria Aprile, Carsten Werner Lederer, Alessandro Ambrosi, Franck Chanut, Francesca Sanvito, Andrea Calabria, Valentina Poletti, Fulvio Mavilio, Eugenio Montini, Luigi Naldini, Patrizia Cristofori, and Giuliana Ferrari**

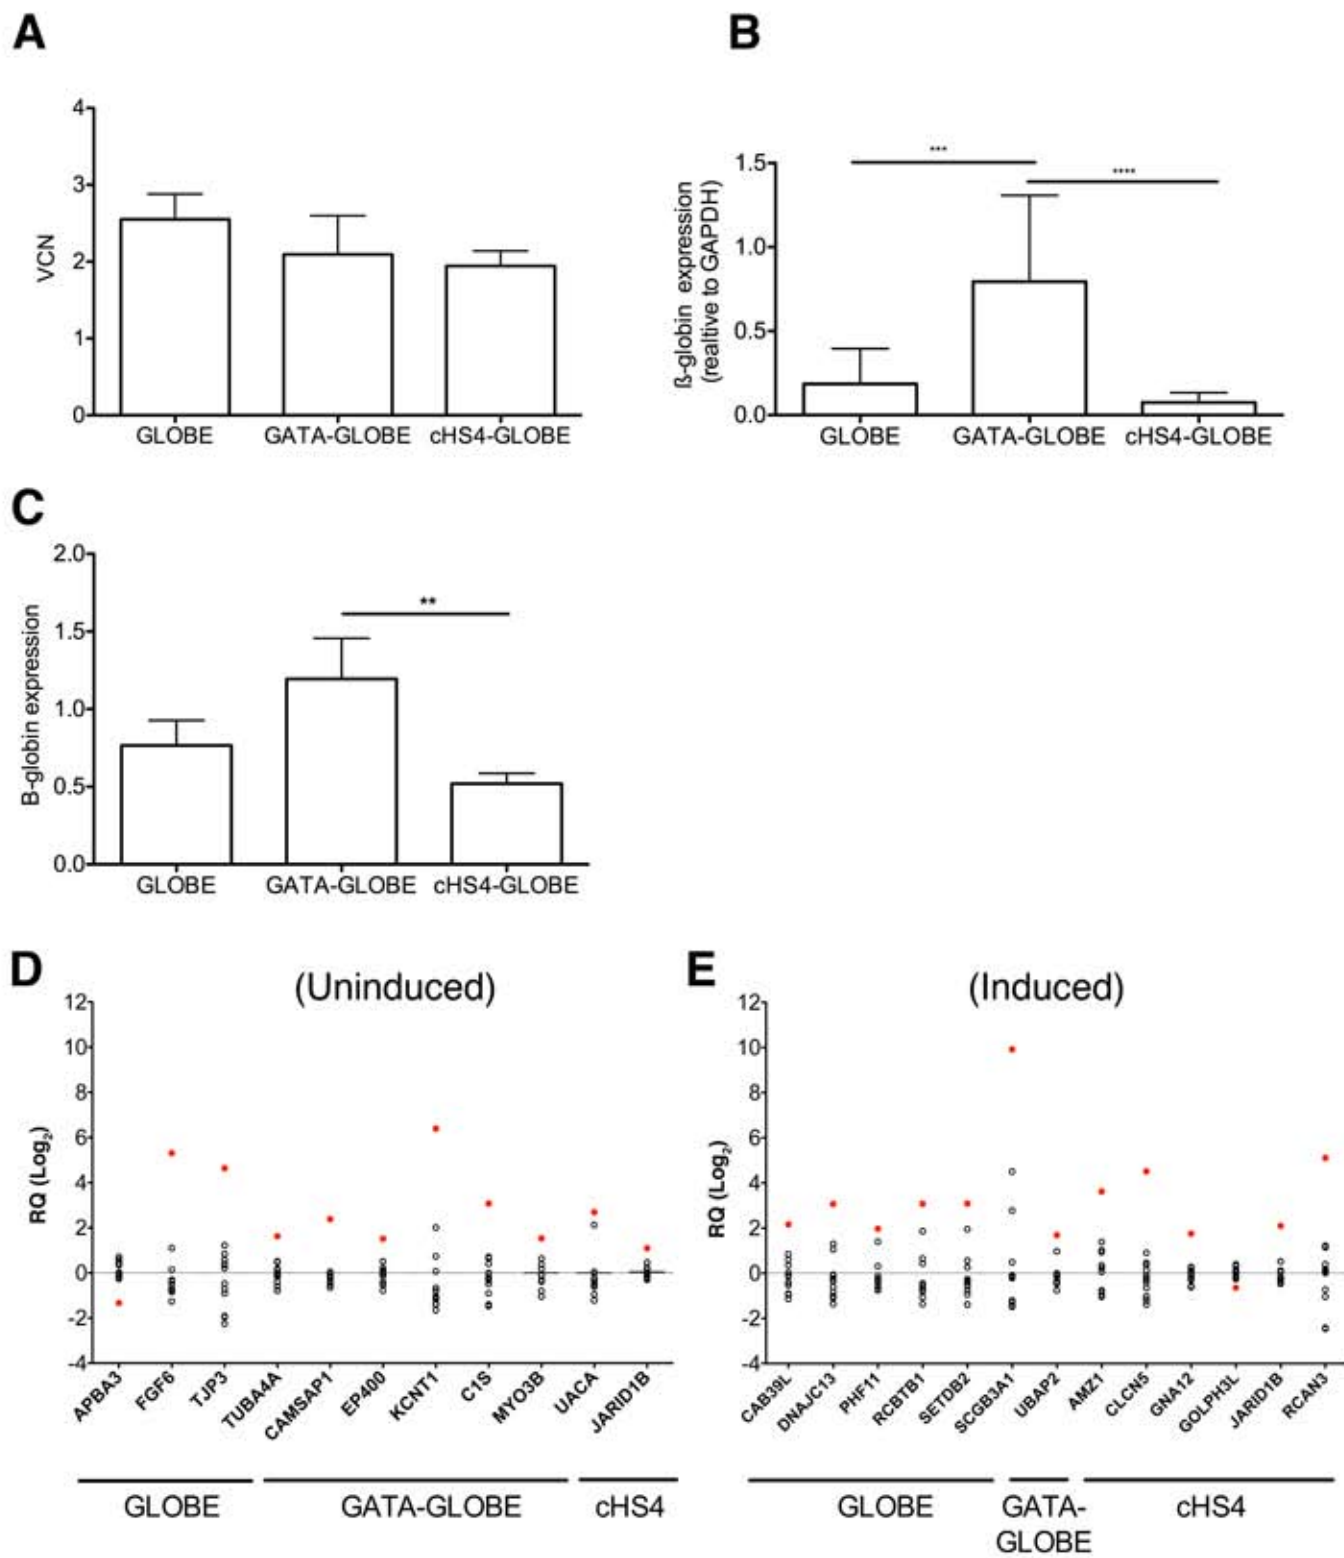

**Fig. S1**

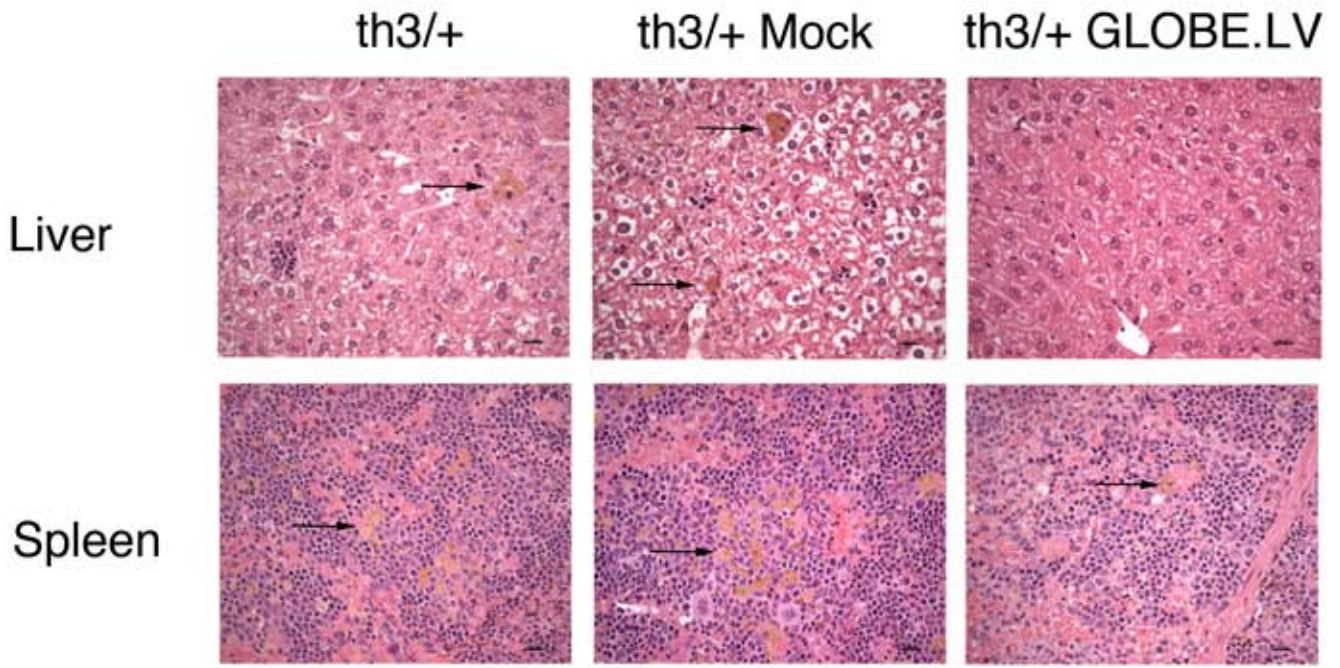

**Fig. S2**

**A**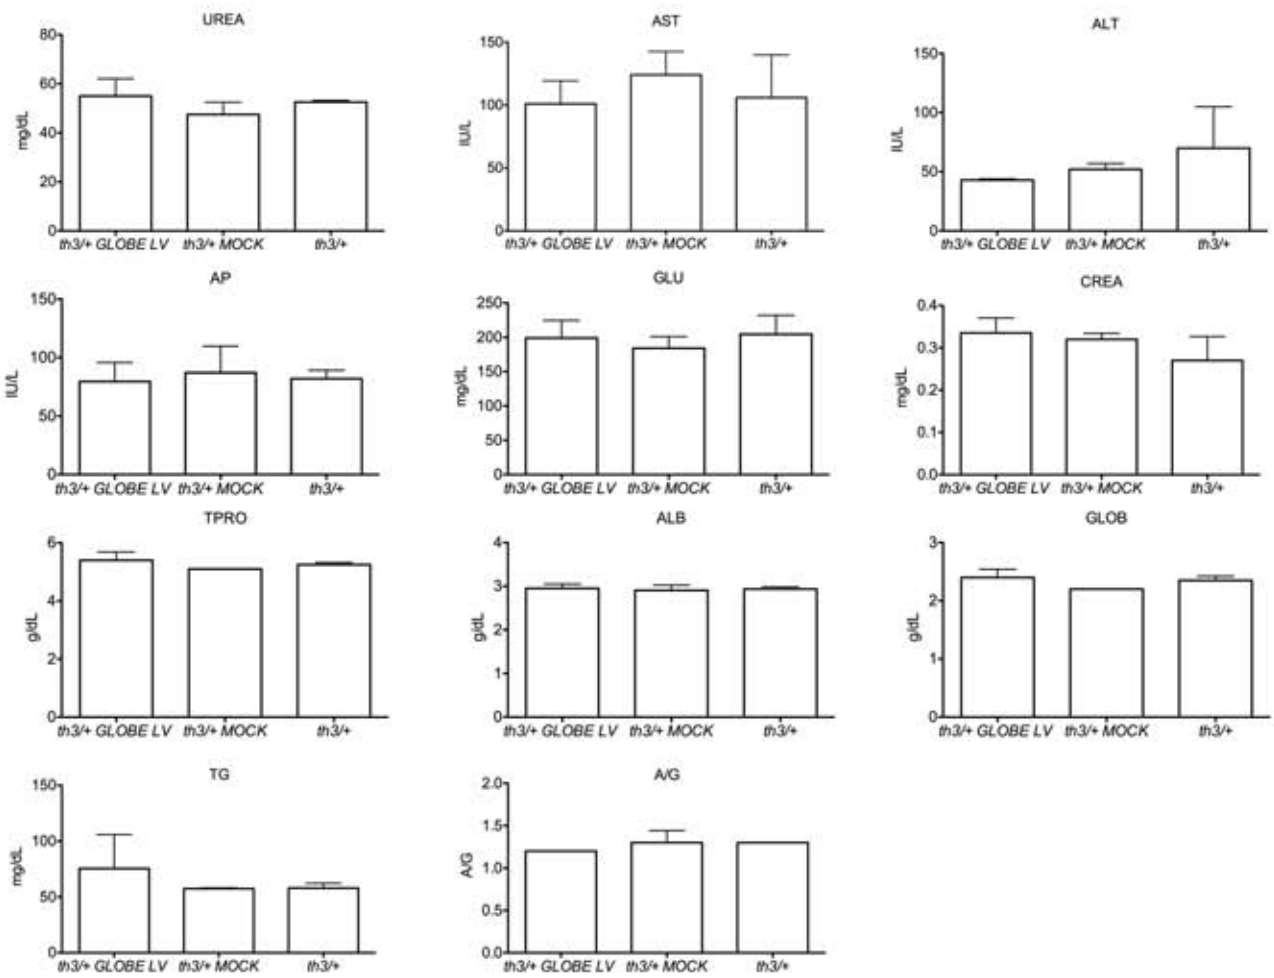**Fig. S3**

**A**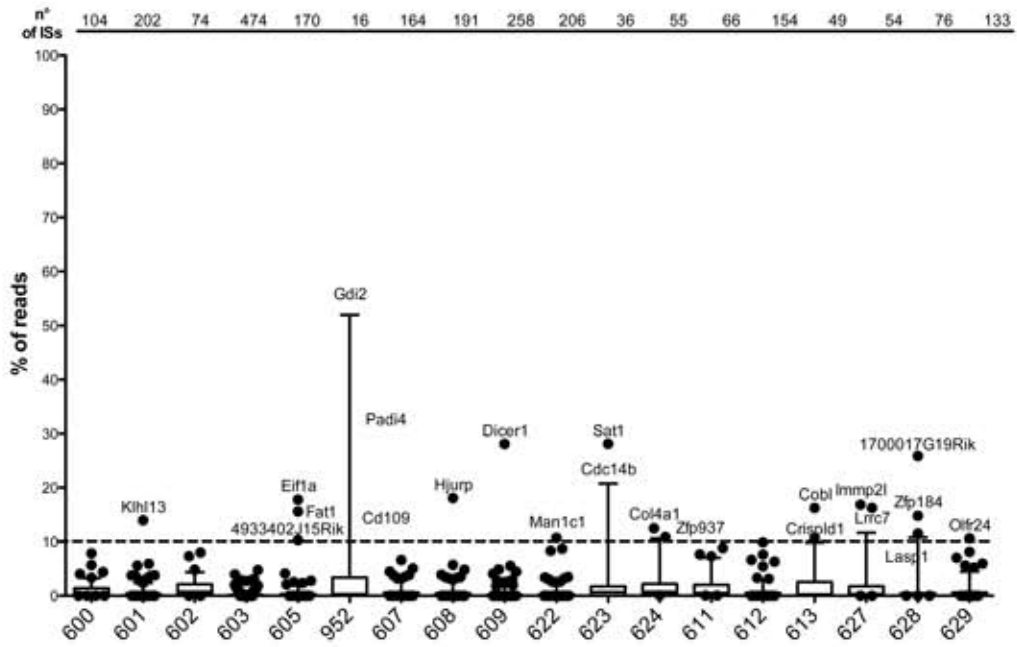**B**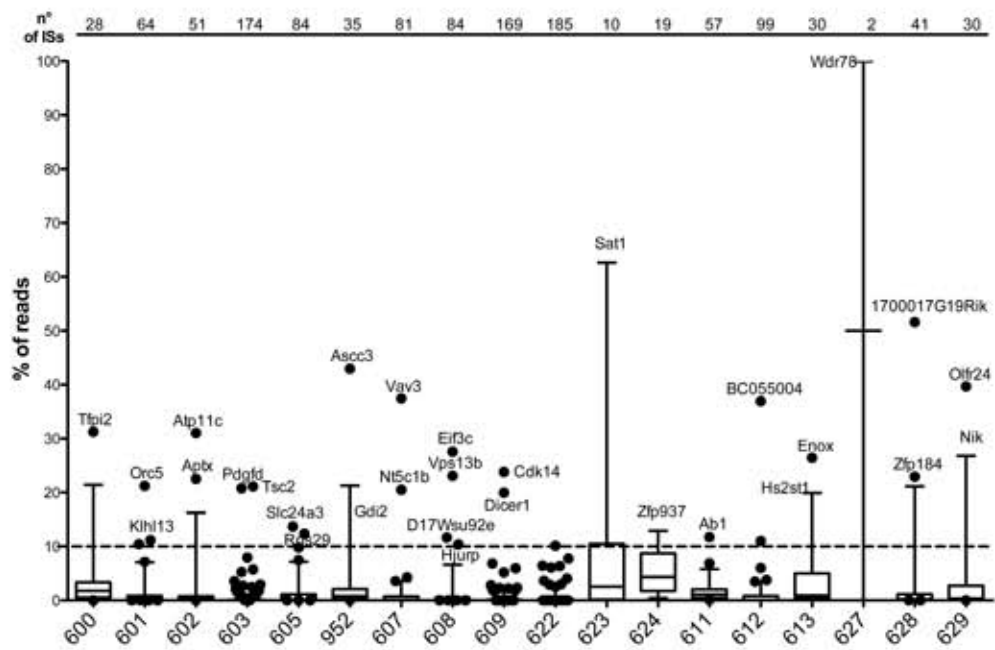**Fig. S4**

**A**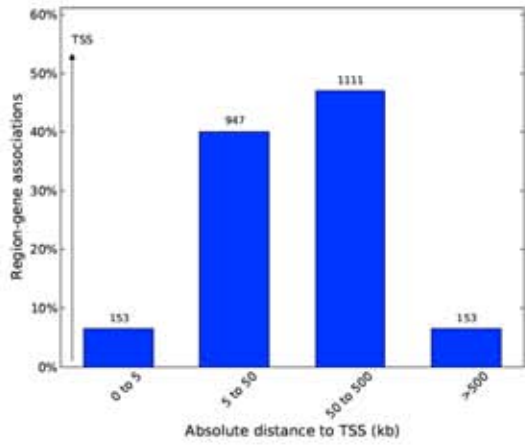**B**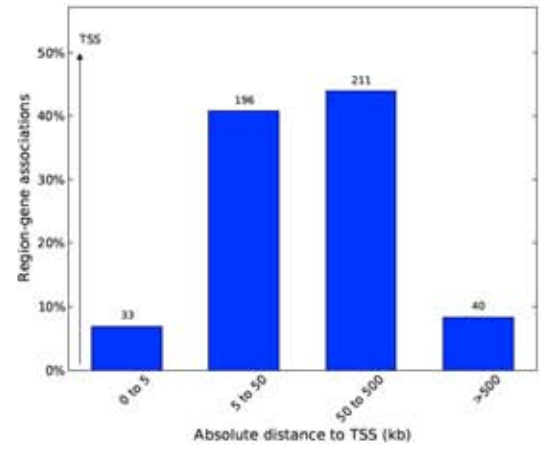**C**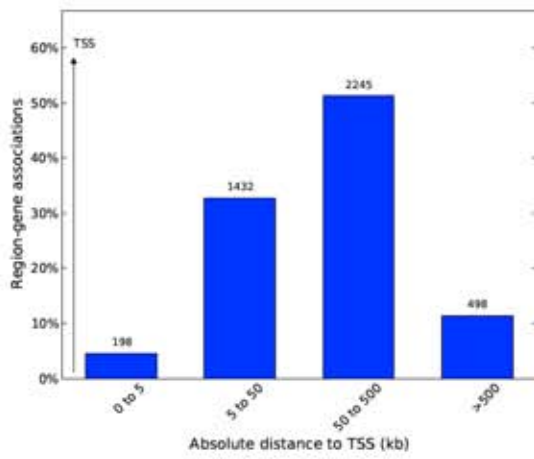**D**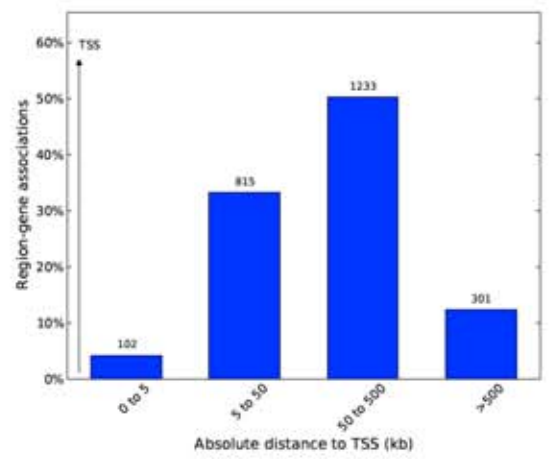**Fig. S5**

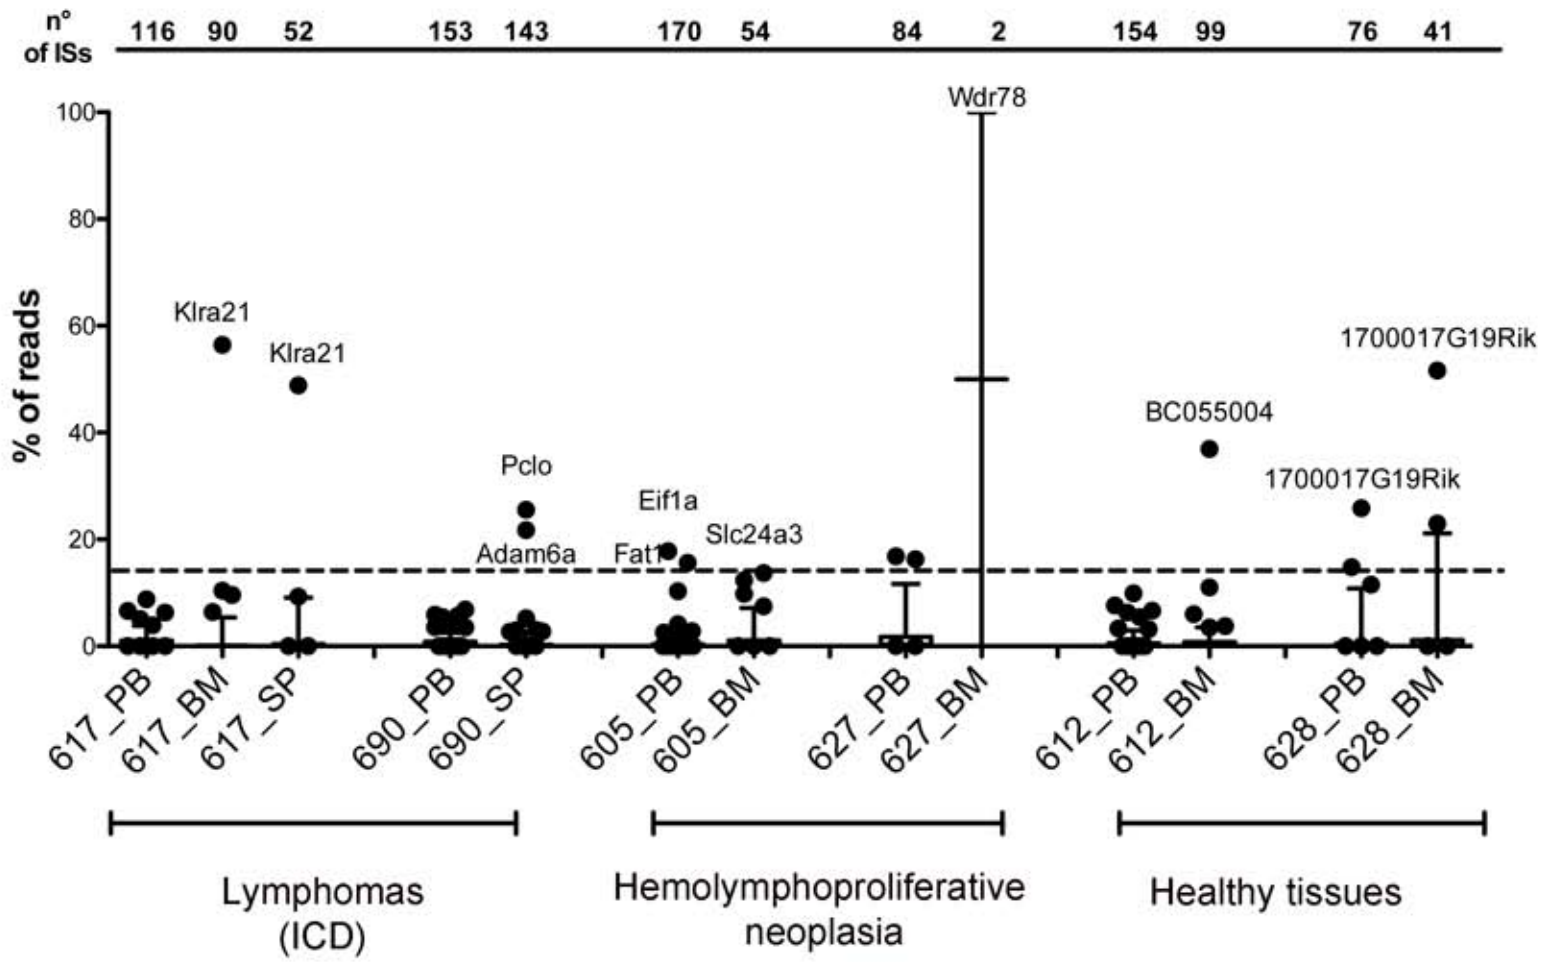

**Fig. S6**



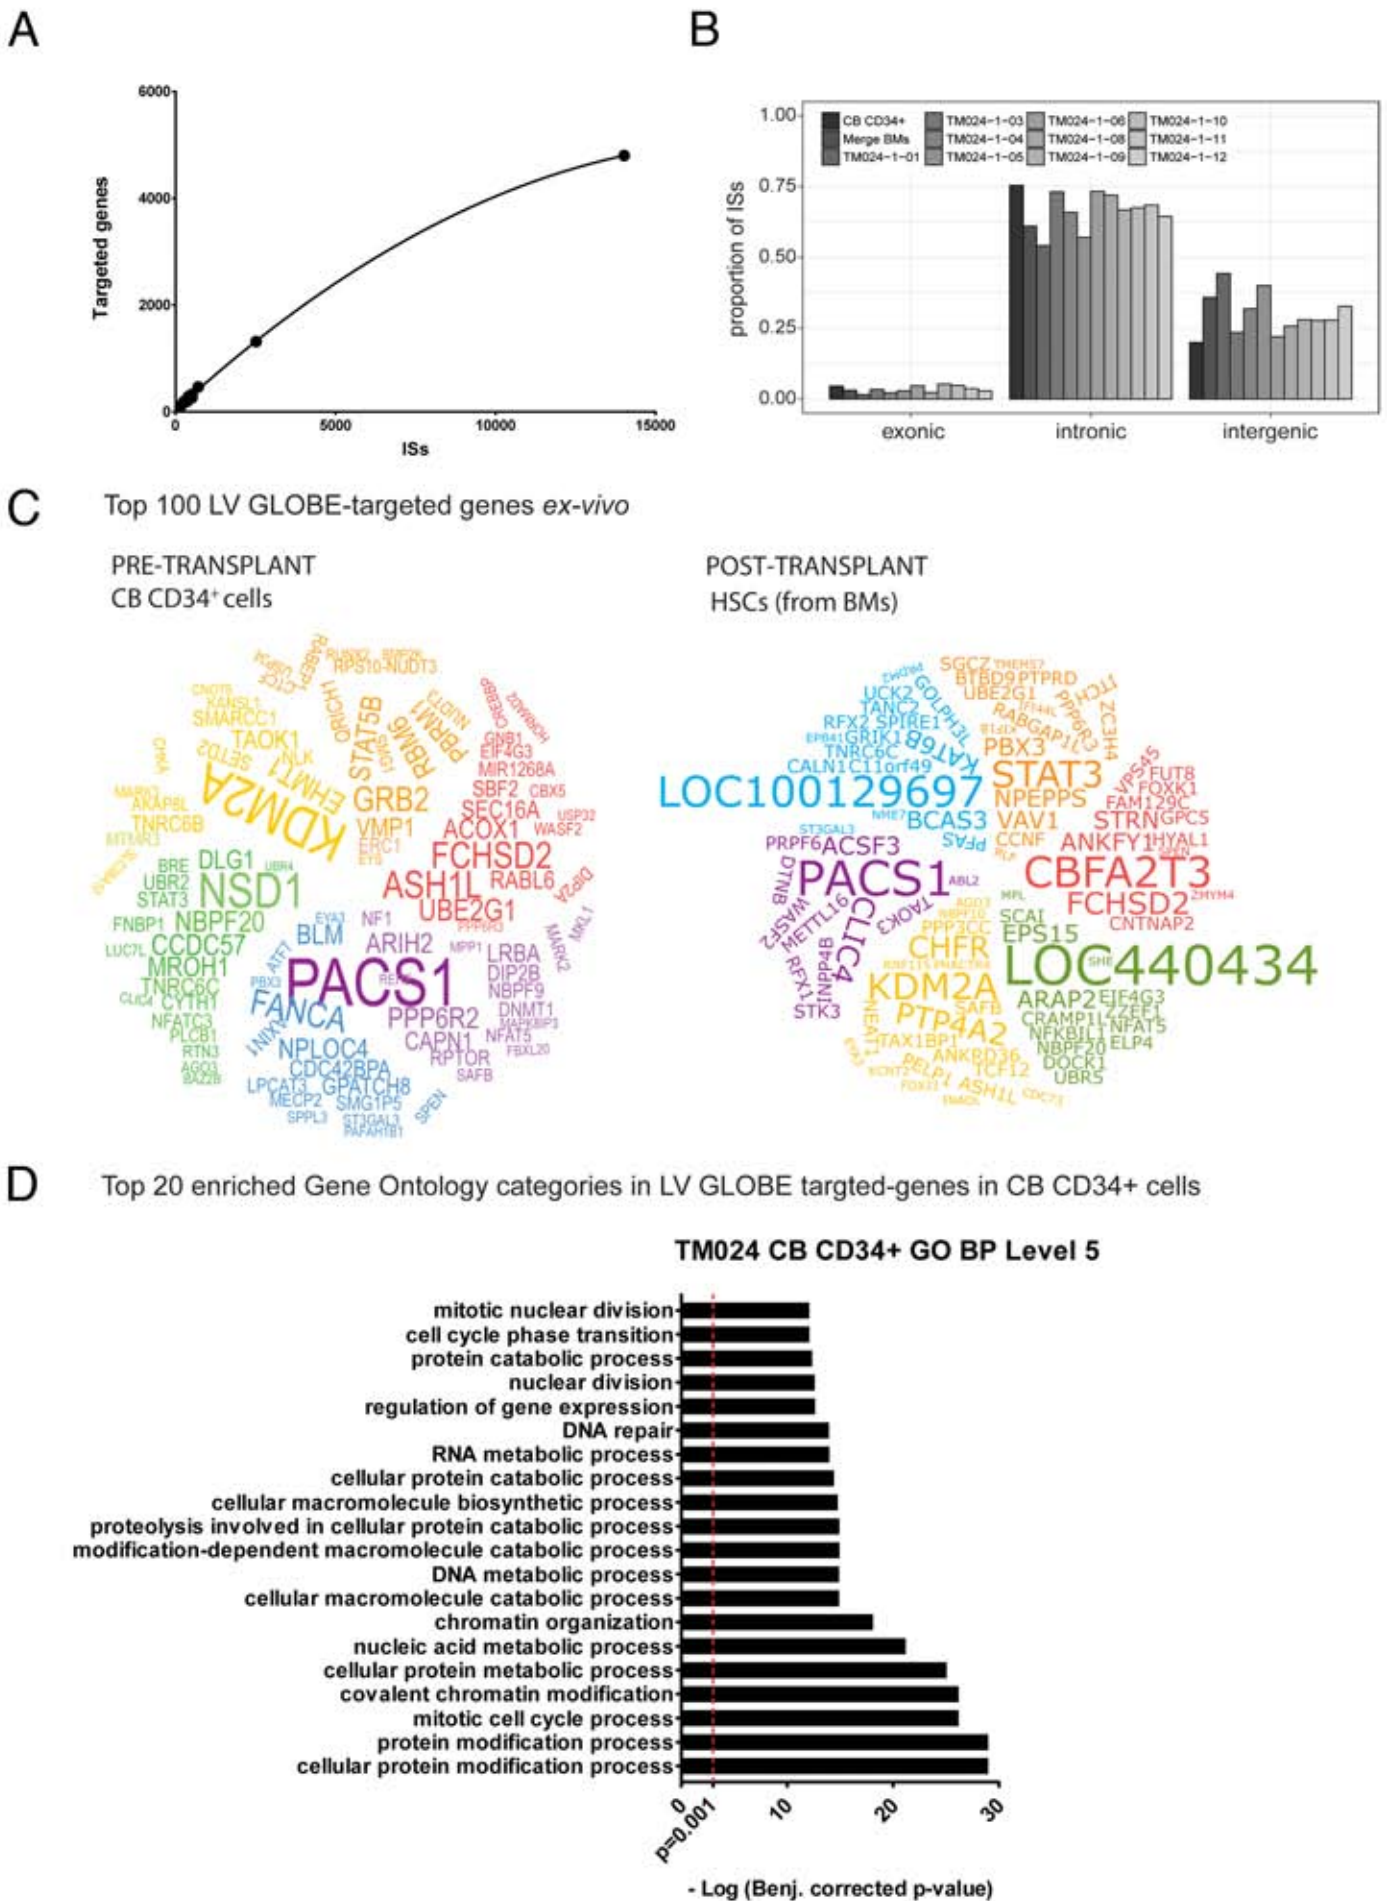

**Fig. S7**



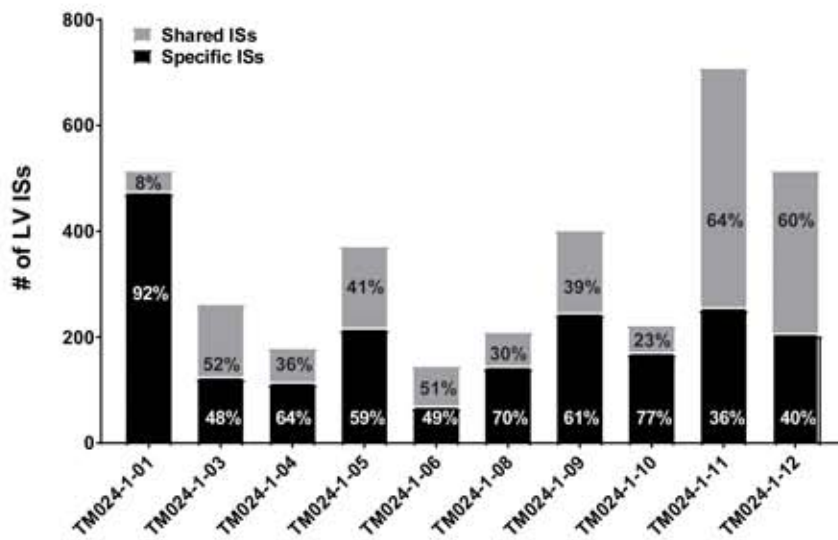

**Fig. S8**

## Supplemental Figure Legends

### Figure S1: Characterization of $\beta$ -globin expressing LVs and analysis of transcriptional perturbation

**A)** VCN of HEL cell clones transduced with GLOBE LV, GATA-GLOBE LV or cHS4-GLOBE LV. Values are shown as mean + SD. Student T-test analysis (two tailed) was applied. **B)** qPCR analysis of  $\beta$ -globin expression in HEL cell clones transduced with GLOBE LV, GATA-GLOBE LV or cHS4-GLOBE LV induced to erythroid differentiation. Data are expressed relative to GAPDH transcript expression and normalized for VCN. Values are shown as mean + SD. Student T-test analysis (two tailed) was applied. \*\*\* = p value < 0.001, \*\*\*\* = p value < 0.0001. **C)** Western Blot analysis of  $\beta$ -globin expression in HEL cell clones transduced with GLOBE LV, GATA-GLOBE LV or cHS4-GLOBE LV induced to erythroid differentiation. Data are expressed relative to GAPDH protein expression and normalized for VCN. Obtained values were normalized respect to clone GATA-GLOBE 12, loaded on every gel as internal control. Values are shown as mean + SD. T-test analysis (two tailed) was applied. \*\* = p value < 0.05. **D)** qPCR analysis of genes significantly up- or down-regulated (p value < 0.001) by proviral integration in Uninduced HEL cell clones and Induced HEL cell clones **E)**. Red dots indicate the expression value of a gene in the test clone, white dots indicate the expression values of the same gene in control clones.

### Figure S2: Extramedullary hematopoiesis in liver and spleen of gene therapy treated mice

Extramedullary hematopoiesis (EMH) in spleen and liver were observed in Th3/+ mice. Related pigmented macrophages (or Kupffer cells) are considered secondary to erythrophagocytosis, Gene therapy treated animals (th3/+ GLOBE.LV) presented signs of efficacy characterized by a prominent reduction of EMH (arrowhead).

### Figure S3: Toxicity evaluation of GLOBE LV transduced cells in th3/+ mouse model

**A)** At termination, PB was collected and used to obtain serum for clinical chemistry. Analyzed parameters were: Urea, Aspartate Aminotransferase (AST), Alanine Aminotransferase (ALT), Alkaline Phosphatase (AP), Glucose (GLU), Creatinine (CREA), (TPRO), Albumin (ALB), Globulin (GLOB), (TG) and the ratio between Albumin and Globulin (A/G). Values are shown as mean + SD. T-test analysis (two tailed) was applied. No difference was observed in all parameters.

### Figure S4: Clonal abundance analysis of PB and BM from gene therapy treated mice

Box plot of the percentage of sequence reads (y-axis) for unequivocally mapped IS from peripheral blood at 16 weeks **A)** and bone marrow at termination **B)** is shown. The number of reads for each IS is normalized to the total number of sequence reads from the same time point. IS over the 95 percentiles of dataset are shown as dots distinct from box and whiskers, which are mostly flattened to the bottom of the plot. The total number of IS for each sample is shown on top.

**Figure S5: Distribution of LV integrations along the genome of transplanted mice**

Integration site (IS) frequency distribution around Transcription Start Site (TSS) of the nearest RefSeq gene, spanning 500 Kb upstream and downstream the TSS. **A)** in vitro cultures **B)** peripheral blood **C)** bone marrow **D)** tumors

**Figure S6: Clonal abundance analysis of tumors and controls from gene therapy treated mice**

Box plot of the percentage of sequence reads (y-axis) for unequivocally mapped IS from mice which developed lymphomas, hemolymphoproliferative neoplasia and healthy controls. The number of reads for each IS is normalized to the total number of sequence reads from the same time point. IS over the 95 percentiles of dataset are shown as dots distinct from box and whiskers, which are mostly flattened to the bottom of the plot. The total number of IS for each sample is shown on top.

**Figure S7. Differential *in vitro* and *ex vivo* integration profile of LV GLOBE.**

**A)** Overall positive correlation between number of ISs and LV-targeted genes in human HSPCs; **B)** Differential distribution of ISs among the intra- and inter-genic regions in pre-transplant CB CD34<sup>+</sup> and post-transplant samples; **C)** World cloud graphs of the top 100 LV-targeted genes in HSPCs *in vitro* (left) and *ex vivo* (right). The size of the word is proportional to the number of ISs, while the color has no particular meaning; **D)** The histogram shows the top 20 most significant enriched GO categories in the list of LV-targeted genes in pre-transplant CB CD34<sup>+</sup> cells, by DAVID analysis.

**Figure S8. ISs shared among different transplanted mice.** The histogram shows the portion of ISs specific for each library (black) or common to other libraries (grey).

Table S1: Perturbated genes by different LVs in Uninduced and Induced HEL cells

|                                | Uninduced |            |       | Induced |            |       |
|--------------------------------|-----------|------------|-------|---------|------------|-------|
|                                | GLOBE     | GATA-GLOBE | cHS4  | GLOBE   | GATA-GLOBE | cHS4  |
| Clones                         | 14        | 11         | 16    | 12      | 10         | 12    |
| Integrations                   | 36        | 30         | 29    | 35      | 23         | 29    |
| Total Genes                    | 92        | 80         | 74    | 87      | 73         | 74    |
| p value (of deregulated genes) | 0.001     | 0.001      | 0.001 | 0.001   | 0.001      | 0.001 |
| Deregulated genes              | 4         | 6          | 1     | 6       | 1          | 6     |
| Up-regulated                   | 3         | 6          | 1     | 6       | 1          | 5     |
| Down-regulated                 | 1         | 0          | 0     | 0       | 0          | 1     |
| Frequency % (on total genes)   | 4.35%     | 7.50%      | 1.35% | 6.90%   | 1.37%      | 8.11% |

Table S2a : VCN and number of Integration sites in the liquid culture and colony forming units (CFUs)

| Sample | Experiment | VCN/cell | Unique IS |
|--------|------------|----------|-----------|
| CFC    | 1          | 9.96     | 194       |
| LC     | 1          | 8.94     | 267       |
| CFC    | 2          | 9.18     | 70        |
| LC     | 2          | 6.36     | 647       |
| CFC    | 3          | 6.35     | na        |
| LC     | 3          | 6.03     | 396       |

Table S2b Percentage of engraftment. VCN and number of integration sites in th3/+ GLOBE LV mice

| Mouse | Sex | Engraftment (PB) 16 weeks | VCN/cell PB | Unique IS PB | Engraftment (PB) 12 months | VCN/cell BM | VCN in marked cells (normalized for engraftment) | Unique IS BM | VCN/cell tumor (SP) | Unique IS tumor (SP) |
|-------|-----|---------------------------|-------------|--------------|----------------------------|-------------|--------------------------------------------------|--------------|---------------------|----------------------|
| 600   | M   | 72.4                      | 9.63        | 104          | 70.2                       | 7.58        | 10.80                                            | 28           |                     |                      |
| 601   | M   | 88.8                      | 3.23        | 202          | 90.7                       | 8.19        | 9.03                                             | 64           |                     |                      |
| 602   | M   | 93.3                      | 7.62        | 74           | 92.6                       | 6.25        | 6.75                                             | 51           |                     |                      |
| 603   | M   | 86.6                      | 5.41        | 474          | 96.5                       | 7.25        | 7.51                                             | 174          |                     |                      |
| 604   | M   | 62.7                      | 4           | na           | 54                         | 2.33        | 4.31                                             | 77           |                     |                      |
| 605   | M   | 78.7                      | 7.44        | 170          | 88.1                       | 10.87       | 12.34                                            | 84           |                     |                      |
| 607   | M   | 73.6                      | 6.46        | 164          | 55.9                       | 7.97        | 14.26                                            | 81           |                     |                      |
| 608   | M   | 82.1                      | 6.17        | 191          | 90                         | 7.95        | 8.83                                             | 84           |                     |                      |
| 609   | M   | 87.2                      | 8.53        | 258          | 95.7                       | 10.07       | 10.52                                            | 169          |                     |                      |
| 610   | M   | 40.4                      | 5.23        | na           | 55.6                       | 0.18        | 0.32                                             | 28           |                     |                      |
| 611   | M   | 97.3                      | 8.79        | 66           | 99.1                       | 2.25        | 2.27                                             | 57           |                     |                      |
| 612   | M   | 100                       | 4.89        | 154          | 99.9                       | 2.35        | 2.35                                             | 99           |                     |                      |
| 613   | M   | 96.8                      | 3.47        | 49           | 99                         | 7.67        | 7.75                                             | 30           |                     |                      |
| 614   | M   | 99.9                      | 3.55        | na           | ICD                        | ICD         | ICD                                              | ICD          |                     |                      |
| 690   | M   | 80.9                      | 15.87       | 153          | ICD                        | ICD         | ICD                                              | ICD          | 7.82                | 143                  |
| 616   | F   | 60.8                      | 4.85        | na           | 60.9                       | 2.8         | 4.60                                             | 47           |                     |                      |
| 617   | F   | 67.3                      | 12.92       | 116          | ICD                        | 16.53       | ICD                                              | 90           | 8.69                | 52                   |
| 618   | F   | 83.5                      | 7.75        | na           | 80.5                       | 16.39       | 20.36                                            | na           |                     |                      |
| 619   | F   | 83.4                      | 13.12       | na           | 77.4                       | 5.57        | 7.20                                             | na           |                     |                      |
| 620   | F   | 49.2                      | 2.51        | na           | 5.4                        | 0.28        | 5.19                                             | na           |                     |                      |
| 621   | F   | 36.3                      | 1.87        | na           | 53.9                       | 1.67        | 3.10                                             | na           |                     |                      |
| 622*  | F   | 97.2                      | 1.87        | 206          | 98.4                       | 7.68        | 7.80                                             | 185          |                     |                      |
| 623   | F   | 12.4                      | 0.88        | 36           | 6.4                        | 0.12        | 1.88                                             | 10           |                     |                      |
| 624   | F   | 91                        | 7.21        | 55           | 92.6                       | 14.57       | 15.73                                            | 19           |                     |                      |
| 625   | F   | 97.3                      | 2.54        | na           | ICD                        | ICD         | ICD                                              | ICD          |                     |                      |
| 626   | F   | 82.6                      | 6.2         | na           | 93.2                       | 0.14        | 0.15                                             | na           |                     |                      |
| 627   | F   | 15.7                      | 1.03        | 54           | 12.8                       | 0.14        | 1.09                                             | 2            |                     |                      |
| 628   | F   | 48.9                      | 1.73        | 76           | 71.6                       | 0.62        | 0.87                                             | 41           |                     |                      |
| 629   | F   | 35.4                      | 2.22        | 133          | 10.5                       | 0.15        | 1.43                                             | 30           |                     |                      |
| 952   | F   | 22                        | 1.32        | 16           | 11.5                       | 0.16        | 1.39                                             | 35           |                     |                      |

\* sacrificed at day 292

Table S2c Percentage of engraftment in th3/+ Mock mice

| Mouse | Sex | Engraftment (PB)<br>16 weeks | Engraftment (PB)<br>12 months |
|-------|-----|------------------------------|-------------------------------|
| 630   | M   | 64.7                         | 65.5                          |
| 632   | M   | 81.8                         | 75.5                          |
| 633   | M   | 70                           | 95                            |
| 634   | M   | 76.5                         | 89.5                          |
| 635   | M   | 84.2                         | 95.5                          |
| 636   | M   | 78.3                         | 87                            |
| 637   | M   | 88.1                         | 92.2                          |
| 638   | M   | 100                          | 99.9                          |
| 639   | M   | 84.2                         | 90.7                          |
| 640   | M   | 99.9                         | 99.9                          |
| 641   | M   | 99.9                         | 100                           |
| 642   | M   | 92.4                         | 93.8                          |
| 643*  | M   | 86.7                         | 91.7                          |
| 644   | M   | 90.9                         | 95.6                          |
| 645   | F   | 96.9                         | 97.8                          |
| 646   | F   | 95.2                         | 79.2                          |
| 647   | F   | 0.4                          | 0.2                           |
| 648   | F   | 0.4                          | 0.6                           |
| 649   | F   | 0.3                          | 0.04                          |
| 650   | F   | 0.4                          | 0.01                          |
| 651   | F   | 5.3                          | 1.8                           |
| 652   | F   | 1                            | 0.4                           |
| 653   | F   | 2.4                          | 0.6                           |
| 654   | F   | 62.2                         | ICD                           |
| 655   | F   | 5.4                          | 1.7                           |
| 656   | F   | 55.9                         | 59.9                          |
| 657   | F   | 66                           | 52                            |
| 658   | F   | 5.7                          | 2.8                           |
| 659   | F   | 22.3                         | 26                            |
| 692   | M   | 90.9                         | 91.3                          |

\* sacrificed at day 158



Table S3a: Haematological evaluation th3/+ GLOBE LV group at termination

| Anima No. | WBC (10 <sup>3</sup> /mm <sup>3</sup> ) | RBC (10 <sup>6</sup> /mm <sup>3</sup> ) | HGB (g/dl) | HCT (%) | MCV (um <sup>3</sup> ) | MCH (pg) | MCHC (g/dl) | PLT (10 <sup>3</sup> /mm <sup>3</sup> ) |
|-----------|-----------------------------------------|-----------------------------------------|------------|---------|------------------------|----------|-------------|-----------------------------------------|
| 600       | 7.0                                     | 8.7                                     | 13.0       | 39.5    | 45.0                   | 14.9     | 33.0        | 1013                                    |
| 601       | 4.7                                     | 8.7                                     | 12.8       | 38.2    | 44.0                   | 14.7     | 33.5        | 1078                                    |
| 602       | 8.9                                     | 8.7                                     | 13.3       | 39.4    | 45.0                   | 15.2     | 33.7        | 1209                                    |
| 603       | 9.8                                     | 9.2                                     | 13.1       | 39.1    | 43.0                   | 14.3     | 33.6        | 1058                                    |
| 604       | 10.1                                    | 8.6                                     | 13.1       | 38.6    | 45.0                   | 15.3     | 34.0        | 1181                                    |
| 605       | 6.8                                     | 9.8                                     | 14.0       | 43.8    | 45.0                   | 14.3     | 32.0        | 858                                     |
| 690       | na                                      | na                                      | na         | na      | na                     | na       | na          | na                                      |
| 607       | 9.3                                     | 9.6                                     | 14.1       | 44.3    | 46.0                   | 14.7     | 31.8        | 949                                     |
| 608       | 8.6                                     | 9.3                                     | 13.7       | 42.3    | 46.0                   | 14.8     | 32.4        | 956                                     |
| 609       | 13.0                                    | 8.4                                     | 13.0       | 38.8    | 46.0                   | 15.5     | 33.5        | 2454                                    |
| 610       | 8.6                                     | 9.3                                     | 13.9       | 43.3    | 46.0                   | 14.8     | 32.1        | 896                                     |
| 611       | 9.3                                     | 8.4                                     | 12.8       | 37.7    | 45.0                   | 15.1     | 33.8        | 614                                     |
| 612       | 6.9                                     | 8.7                                     | 13.8       | 40.7    | 47.0                   | 15.8     | 33.9        | 1650                                    |
| 613       | 9.2                                     | 9.2                                     | 14.0       | 41.3    | 45.0                   | 15.2     | 34.0        | 881                                     |
| 614       | na                                      | na                                      | na         | na      | na                     | na       | na          | na                                      |
| 952       | 8.9                                     | 8.4                                     | 10.2       | 30.8    | 37.0                   | 12.1     | 33.1        | 2177                                    |
| 616       | 8.3                                     | 8.5                                     | 11.1       | 34.4    | 41.0                   | 13.0     | 32.1        | 1451                                    |
| 617       | na                                      | na                                      | na         | na      | na                     | na       | na          | na                                      |
| 618       | 16.8                                    | 10.2                                    | 13.7       | 43.1    | 42.0                   | 13.4     | 31.9        | 1054                                    |
| 619       | 5.0                                     | 7.8                                     | 11.3       | 34.2    | 44.0                   | 14.6     | 33.1        | 842                                     |
| 620       | 14.6                                    | 8.0                                     | 9.5        | 29.4    | 37.0                   | 11.9     | 32.2        | 2004                                    |
| 621       | 6.2                                     | 8.8                                     | 11.8       | 36.2    | 41.0                   | 13.4     | 32.6        | 1280                                    |
| 622       | na                                      | na                                      | na         | na      | na                     | na       | na          | na                                      |
| 623       | 4.2                                     | 8.9                                     | 13.7       | 39.7    | 45.0                   | 15.5     | 34.6        | 810                                     |
| 624       | 6.5                                     | 8.6                                     | 12.9       | 38.0    | 44.0                   | 15.0     | 33.9        | 920                                     |
| 625       | na                                      | na                                      | na         | na      | na                     | na       | na          | na                                      |
| 626       | 7.2                                     | 8.5                                     | 12.8       | 37.8    | 44.0                   | 15.0     | 33.8        | 920                                     |
| 627       | 2.7                                     | 7.1                                     | 12.9       | 36.3    | 51.0                   | 18.1     | 35.5        | 911                                     |
| 628       | 8.1                                     | 8.8                                     | 13.7       | 38.0    | 43.0                   | 15.6     | 35.9        | 968                                     |
| 629       | 3.0                                     | 8.6                                     | 14.2       | 39.4    | 46.0                   | 16.6     | 36.0        | 1040                                    |

Table S3b: Haematological evaluation th3/+ Mock group at termination

| Anima No. | WBC (10 <sup>3</sup> /mm <sup>3</sup> ) | RBC (10 <sup>6</sup> /mm <sup>3</sup> ) | HGB (g/dl) | HCT (%) | MCV (um <sup>3</sup> ) | MCH (pg) | MCHC (g/dl) | PLT (10 <sup>3</sup> /mm <sup>3</sup> ) |
|-----------|-----------------------------------------|-----------------------------------------|------------|---------|------------------------|----------|-------------|-----------------------------------------|
| 630       | 6.8                                     | 3.1                                     | 4.3        | 12.1    | 39.0                   | 13.8     | 35.7        | 1054                                    |
| 692       | 14.2                                    | 7.0                                     | 9.1        | 27.3    | 39.0                   | 13.0     | 33.3        | 2212                                    |
| 632       | 13.6                                    | 6.5                                     | 8.5        | 25.5    | 39.0                   | 13.0     | 33.2        | 1862                                    |
| 633       | 15.5                                    | 7.3                                     | 9.5        | 28.9    | 40.0                   | 13.0     | 32.9        | 1990                                    |
| 634       | 5.4                                     | 2.4                                     | 3.6        | 9.9     | 41.0                   | 14.8     | 36.2        | 773                                     |
| 635       | 23.2                                    | 6.3                                     | 8.4        | 25.3    | 40.0                   | 13.3     | 33.1        | 1985                                    |
| 636       | 31.0                                    | 7.3                                     | 9.9        | 31.3    | 43.0                   | 13.6     | 31.7        | 1892                                    |
| 637       | 34.6                                    | 6.9                                     | 10.0       | 29.2    | 42.0                   | 14.5     | 34.4        | 2256                                    |
| 638       | 35.0                                    | 6.6                                     | 9.7        | 29.5    | 45.0                   | 14.7     | 33.0        | 2235                                    |
| 639       | 27.1                                    | 6.5                                     | 9.4        | 27.5    | 42.0                   | 14.4     | 34.2        | 2129                                    |
| 640       | 21.5                                    | 7.0                                     | 10.1       | 29.8    | 43.0                   | 14.4     | 33.9        | 1902                                    |
| 641       | 16.1                                    | 6.6                                     | 9.5        | 27.7    | 42.0                   | 14.4     | 34.4        | 2090                                    |
| 642       | 17.7                                    | 6.9                                     | 9.8        | 29.0    | 42.0                   | 14.2     | 33.9        | 2100                                    |
| 643       | na                                      | na                                      | na         | na      | na                     | na       | na          | na                                      |
| 644       | 16.3                                    | 6.6                                     | 9.4        | 27.8    | 42.0                   | 14.3     | 33.8        | 1800                                    |
| 645       | 14.0                                    | 7.3                                     | 9.9        | 28.9    | 39.0                   | 13.5     | 34.1        | 2286                                    |
| 646       | 21.2                                    | 7.7                                     | 10.0       | 30.0    | 39.0                   | 13.1     | 33.4        | 2133                                    |
| 647       | 16.3                                    | 7.0                                     | 9.5        | 28.4    | 41.0                   | 13.6     | 33.4        | 1935                                    |
| 648       | 17.7                                    | 7.2                                     | 9.7        | 29.3    | 41.0                   | 13.5     | 33.1        | 2006                                    |
| 649       | 37.6                                    | 7.0                                     | 10.1       | 30.9    | 44.0                   | 14.4     | 32.7        | 2210                                    |
| 650       | 35.1                                    | 6.8                                     | 9.3        | 28.5    | 42.0                   | 13.7     | 32.5        | 2231                                    |
| 651       | 15.0                                    | 6.8                                     | 9.6        | 27.3    | 40.0                   | 14.2     | 35.3        | 1915                                    |
| 652       | 14.7                                    | 6.8                                     | 9.6        | 27.2    | 40.0                   | 14.2     | 35.3        | 1717                                    |
| 653       | 15.8                                    | 6.3                                     | 9.0        | 26.2    | 42.0                   | 14.4     | 34.4        | 1759                                    |
| 654       | na                                      | na                                      | na         | na      | na                     | na       | na          | na                                      |
| 655       | 14.0                                    | 6.9                                     | 9.5        | 27.6    | 40.0                   | 13.9     | 34.5        | 1977                                    |
| 656       | 28.1                                    | 6.7                                     | 9.9        | 27.5    | 41.0                   | 14.7     | 35.9        | 2032                                    |
| 657       | 0.0                                     | 6.9                                     | 9.7        | 27.9    | 41.0                   | 14.1     | 34.7        | 2054                                    |
| 658       | 0.0                                     | 7.0                                     | 9.8        | 28.5    | 41.0                   | 14.1     | 34.5        | 2123                                    |
| 659       | 0.0                                     | 7.0                                     | 10.1       | 28.9    | 41.0                   | 14.4     | 34.9        | 2073                                    |

Table S3c: Haematological evaluation th3/+ group at termination

| Anima No. | WBC (10 <sup>3</sup> /mm <sup>3</sup> ) | RBC (10 <sup>6</sup> /mm <sup>3</sup> ) | HGB (g/dl) | HCT (%) | MCV (um <sup>3</sup> ) | MCH (pg) | MCHC (g/dl) | PLT (10 <sup>3</sup> /mm <sup>3</sup> ) |
|-----------|-----------------------------------------|-----------------------------------------|------------|---------|------------------------|----------|-------------|-----------------------------------------|
| 660       | 4.2                                     | 6.2                                     | 5.4        | 24.2    | 39.0                   | 8.7      | 22.4        | 1347                                    |
| 661       | 25.1                                    | 8.0                                     | 10.3       | 31.4    | 39.0                   | 12.9     | 32.9        | 2467                                    |
| 662       | 18.2                                    | 7.2                                     | 9.4        | 27.9    | 39.0                   | 13.1     | 33.6        | 2128                                    |
| 663       | 14.3                                    | 7.1                                     | 9.3        | 28.0    | 40.0                   | 13.2     | 33.2        | 2078                                    |
| 664       | 18.1                                    | 5.7                                     | 8.3        | 24.6    | 43.0                   | 14.5     | 33.7        | 1933                                    |
| 665       | 18.2                                    | 5.9                                     | 8.5        | 25.5    | 44.0                   | 14.5     | 33.4        | 1943                                    |
| 666       | 19.6                                    | 6.2                                     | 8.9        | 26.7    | 43.0                   | 14.4     | 33.2        | 1971                                    |
| 935       | 29.4                                    | 6.9                                     | 9.8        | 30.1    | 44.0                   | 14.2     | 32.5        | 1655                                    |
| 691       | 38.1                                    | 6.9                                     | 10.0       | 30.7    | 44.0                   | 14.5     | 32.7        | 2078                                    |
| 669       | 36.7                                    | 6.8                                     | 9.6        | 28.7    | 42.0                   | 14.1     | 33.5        | 2302                                    |
| 670       | 18.9                                    | 6.7                                     | 9.5        | 28.1    | 42.0                   | 14.3     | 33.8        | 1854                                    |
| 671       | 16.9                                    | 6.5                                     | 9.4        | 17.6    | 42.0                   | 14.5     | 34.2        | 1821                                    |
| 672       | 15.7                                    | 6.6                                     | 9.6        | 27.5    | 42.0                   | 14.5     | 34.9        | 2096                                    |
| 673       | 17.9                                    | 6.8                                     | 9.8        | 28.6    | 42.0                   | 14.4     | 34.3        | 2108                                    |
| 674       | 15.0                                    | 7.3                                     | 10.1       | 29.2    | 40.0                   | 13.9     | 34.6        | 1957                                    |
| 675       | 16.2                                    | 7.0                                     | 9.2        | 27.2    | 39.0                   | 13.2     | 33.9        | 2220                                    |
| 676       | 16.9                                    | 7.1                                     | 9.4        | 27.6    | 39.0                   | 13.3     | 34.0        | 2224                                    |
| 677       | 29.9                                    | 7.1                                     | 9.7        | 30.0    | 42.0                   | 13.7     | 32.2        | 1790                                    |
| 678       | 24.7                                    | 7.5                                     | 10.3       | 31.1    | 42.0                   | 13.9     | 33.3        | 2385                                    |
| 679       | 25.3                                    | 7.5                                     | 10.4       | 31.2    | 42.0                   | 14.0     | 33.5        | 2335                                    |
| 680       | 29.6                                    | 7.6                                     | 10.0       | 30.7    | 41.0                   | 13.2     | 32.5        | 2347                                    |
| 681       | 13.8                                    | 6.8                                     | 9.5        | 27.5    | 40.0                   | 13.9     | 34.5        | 1899                                    |
| 682       | 13.2                                    | 6.5                                     | 9.0        | 25.9    | 40.0                   | 13.9     | 34.6        | 1705                                    |
| 683       | 16.0                                    | 6.3                                     | 9.2        | 26.4    | 42.0                   | 14.5     | 34.7        | 1726                                    |
| 684       | 21.7                                    | 7.1                                     | 10.1       | 30.0    | 42.0                   | 14.2     | 33.8        | 1523                                    |
| 685       | 25.1                                    | 7.1                                     | 10.6       | 29.6    | 42.0                   | 14.8     | 35.6        | 2105                                    |
| 686       | 28.5                                    | 7.1                                     | 10.0       | 28.8    | 41.0                   | 14.1     | 34.6        | 2147                                    |
| 687       | 27.6                                    | 6.1                                     | 8.8        | 27.0    | 44.0                   | 14.4     | 32.4        | 1609                                    |
| 688       | 28.4                                    | 6.8                                     | 9.6        | 28.6    | 42.0                   | 14.2     | 33.6        | 2290                                    |
| 689       | 36.4                                    | 6.6                                     | 9.9        | 29.5    | 45.0                   | 15.0     | 33.5        | 2209                                    |

Table S4: RTCGD analysis

| Sample               | in vitro | PB   | BM   | SP   |
|----------------------|----------|------|------|------|
| n° of genes tested   | 1290     | 1765 | 1010 | 175  |
| n° of genes in RTCGD | 286      | 401  | 209  | 30   |
| % of genes in RTCGD  | 22.2     | 22.7 | 20.7 | 17.1 |

Table S5. ISs distribution along the human genome

| Sample                     | Raw reads | Mapped reads | # LV ISs | Inter-genic | Intra-genic (Exons) | Intra-genic (Introns) | # LV-targeted genes |
|----------------------------|-----------|--------------|----------|-------------|---------------------|-----------------------|---------------------|
| <b>CB CD34<sup>+</sup></b> | 4.611.257 | 3.287.603    | 14.023   | 0.05        | 0.2                 | 0.75                  | 4.802               |
| <b>TM024-1-01</b>          | 2.384.753 | 1.056.020    | 515      | 0.02        | 0.44                | 0.54                  | 265                 |
| <b>TM024-1-03</b>          | 693.561   | 438.794      | 263      | 0.03        | 0.24                | 0.73                  | 191                 |
| <b>TM024-1-04</b>          | 556.507   | 402.491      | 180      | 0.02        | 0.32                | 0.66                  | 120                 |
| <b>TM024-1-05</b>          | 879.491   | 598.145      | 372      | 0.03        | 0.4                 | 0.57                  | 201                 |
| <b>TM024-1-06</b>          | 809.812   | 525.727      | 146      | 0.05        | 0.22                | 0.73                  | 107                 |
| <b>TM024-1-08</b>          | 876.857   | 583.019      | 210      | 0.02        | 0.26                | 0.72                  | 151                 |
| <b>TM024-1-09</b>          | 950.808   | 757.092      | 402      | 0.05        | 0.28                | 0.67                  | 287                 |
| <b>TM024-1-10</b>          | 674.862   | 277.620      | 223      | 0.05        | 0.28                | 0.68                  | 149                 |
| <b>TM024-1-11</b>          | 1.222.899 | 727.632      | 709      | 0.04        | 0.28                | 0.68                  | 465                 |
| <b>TM024-1-12</b>          | 677.594   | 475.264      | 515      | 0.03        | 0.33                | 0.64                  | 327                 |
| <b>TM024 merge BMs</b>     | 9.727.144 | 5.844.941    | 2.518    | 0.03        | 0.35                | 0.62                  | 1.316               |

Table S6. ISs and targeted genes in common between pre- and post-transplant samples.

| <b>Targeted genes</b>               | <b>TM024<br/>1-01</b> | <b>TM024<br/>1-03</b> | <b>TM024<br/>1-04</b> | <b>TM024<br/>1-05</b> | <b>TM024<br/>1-06</b> | <b>TM024<br/>1-08</b> | <b>TM024<br/>1-09</b> | <b>TM024<br/>1-10</b> | <b>TM024<br/>1-11</b> | <b>TM024<br/>1-12</b> |
|-------------------------------------|-----------------------|-----------------------|-----------------------|-----------------------|-----------------------|-----------------------|-----------------------|-----------------------|-----------------------|-----------------------|
| Tot                                 | 265                   | 191                   | 120                   | 201                   | 107                   | 151                   | 287                   | 149                   | 465                   | 327                   |
| Specific                            | 119                   | 48                    | 35                    | 52                    | 27                    | 45                    | 90                    | 47                    | 124                   | 91                    |
| <b>Shared with<br/>CB_CD34+</b>     | 146                   | 143                   | 85                    | 149                   | 80                    | 106                   | 197                   | 102                   | 341                   | 236                   |
| <b>Shared with<br/>CB_CD34+ (%)</b> | 55%                   | 75%                   | 71%                   | 74%                   | 75%                   | 70%                   | 69%                   | 68%                   | 73%                   | 72%                   |

  

| <b>Individual ISs</b>               | <b>TM024<br/>1-01</b> | <b>TM024<br/>1-03</b> | <b>TM024<br/>1-04</b> | <b>TM024<br/>1-05</b> | <b>TM024<br/>1-06</b> | <b>TM024<br/>1-08</b> | <b>TM024<br/>1-09</b> | <b>TM024<br/>1-10</b> | <b>TM024<br/>1-11</b> | <b>TM024<br/>1-12</b> |
|-------------------------------------|-----------------------|-----------------------|-----------------------|-----------------------|-----------------------|-----------------------|-----------------------|-----------------------|-----------------------|-----------------------|
| Tot                                 | 515                   | 263                   | 180                   | 372                   | 146                   | 210                   | 402                   | 223                   | 709                   | 515                   |
| Specific                            | 515                   | 262                   | 180                   | 371                   | 146                   | 210                   | 400                   | 223                   | 708                   | 515                   |
| <b>Shared with<br/>CB_CD34+</b>     | 0                     | 1                     | 0                     | 1                     | 0                     | 0                     | 2                     | 0                     | 1                     | 0                     |
| <b>Shared with<br/>CB_CD34+ (%)</b> | 0.0%                  | 0.4%                  | 0.0%                  | 0.3%                  | 0.0%                  | 0.0%                  | 0.5%                  | 0.0%                  | 0.1%                  | 0.0%                  |

Table S7. Shared ISs between individual pre- and post-transplant samples

|                      | TM024<br>1-01 | TM024<br>1-03 | TM024<br>1-04 | TM024<br>1-05 | TM024<br>1-06 | TM024<br>1-08 | TM024<br>1-09 | TM024<br>1-10 | TM024-<br>1-11 | TM024<br>1-12 | CB<br>CD34 <sup>+</sup> |
|----------------------|---------------|---------------|---------------|---------------|---------------|---------------|---------------|---------------|----------------|---------------|-------------------------|
| TM024-1-01           | 472           | 0             | 1             | 4             | 0             | 11            | 24            | 3             | 23             | 12            | -                       |
| TM024-1-03           | 0             | 124           | 13            | 14            | 6             | 14            | 47            | 12            | 129            | 77            | 1                       |
| TM024-1-04           | 1             | 13            | 114           | 17            | 3             | 19            | 35            | 13            | 62             | 44            | -                       |
| TM024-1-05           | 4             | 14            | 17            | 213           | 8             | 5             | 44            | 5             | 147            | 119           | 1                       |
| TM024-1-06           | 0             | 6             | 3             | 8             | 66            | 28            | 49            | 17            | 77             | 54            | -                       |
| TM024-1-08           | 11            | 14            | 19            | 5             | 28            | 145           | 48            | 26            | 55             | 49            | -                       |
| TM024-1-09           | 24            | 47            | 35            | 44            | 49            | 48            | 242           | 30            | 137            | 124           | 2                       |
| TM024-1-10           | 3             | 12            | 13            | 5             | 17            | 26            | 30            | 171           | 52             | 32            | -                       |
| TM024-1-11           | 23            | 129           | 62            | 147           | 77            | 55            | 137           | 52            | 251            | 287           | 1                       |
| TM024-1-12           | 12            | 77            | 44            | 119           | 54            | 49            | 124           | 32            | 287            | 206           | -                       |
| CB CD34 <sup>+</sup> | 0             | 1             | 0             | 1             | 0             | 0             | 2             | 0             | 1              | 0             | 14.023                  |
